# 1 **Potential impact of sexual transmission of Ebola virus on the epidemic in West**

## 2 **Africa**

3

## 4 **Authors**

5 Jessica L. Abbate<sup>1,2,3 \*</sup>

6 Carmen Lia Murall<sup>4 \*</sup>

7 Heinz Richner<sup>1</sup>

8 Christian L. Althaus<sup>5</sup>

9

10 \*These authors contributed equally to this article.

11

## 12 **Affiliations**

13 1. Institute for Ecology and Evolution, University of Bern, Bern, Switzerland

14 2. UMR MIVEGEC (UMR CNRS 5290, IRD 224, UM), Institute for Research of  
15 Development (IRD), Montpellier, France

16 3. UMR UMMISCO (UMI 209 IRD-UPMC), Bondy, France

17 4. Max-Planck Institute for Dynamics and Self-Organization, Gottingen, Germany

18 5. Institute of Social and Preventive Medicine (ISPM), University of Bern, Bern,  
19 Switzerland

20

21 **Key Words:** Ebola virus, epidemiology, emerging infectious disease, sexually  
22 transmitted infection, mathematical modeling, basic reproductive number

## 23    **Abstract**

24    Ebola virus RNA can persist in seminal fluids of male convalescent patients after they  
 25    recover from Ebola virus disease (EVD). We used a compartmental EVD transmission  
 26    model, Monte Carlo simulations, and performed sensitivity analyses to assess the  
 27    potential impact of sexual transmission on the epidemic dynamics. The rate of sexual  
 28    transmission and the period during which convalescent men can transmit sexually both  
 29    affect the number of excess EVD cases, while the latter also influences the duration of the  
 30    epidemic. Assuming an average convalescent period of 3 months, and a per sex act  
 31    transmission probability of 0.1%, we found that sexual transmission could extend the  
 32    EVD epidemic in Sierra Leone by 123 days (95% CI: 110–137 days). These results show  
 33    the importance of ongoing surveillance efforts in West Africa and call for a better  
 34    understanding of the persistence and infectivity of Ebola virus RNA in convalescent  
 35    patients.

## Introduction

Recent reports suggesting the potential for sexual transmission of Ebola virus from convalescent survivors have raised a number of important questions regarding its impact on the final phase of the epidemic in West Africa [1,2]. Even once the worst hit countries of Guinea, Liberia, and Sierra Leone are declared free of Ebola virus disease (EVD), rare cases may still arise from the large number of remaining survivors. Perhaps the most crucial element for bringing the epidemic to an end is maintaining vigilance in the community and preventing new chains of transmission. Historically occurring in sparsely-populated isolated communities, often killing the vast majority of victims [3], the unprecedented number of cases – and survivors – in densely populated urban areas presents novel challenges for bringing the outbreak to an end. Although sexual transmission of EVD is likely to be rare, it is important to investigate its potential impact on the transmission dynamics in general, and on the tail of the ongoing epidemic in particular.

Follow-up studies on survivors of the 1995 outbreak in the Democratic Republic of Congo [4] and the 2000 [5] and 2007 [6] outbreaks in Uganda have raised awareness of what is now being termed “post-Ebola syndrome” (post-Ebola sequelae) – debilitating illnesses from myalgia to uveitis – which can persist for at least 21 months after the onset of symptoms. Though the virus is no longer detected in the blood after symptoms disappear, active (replicating) virus has been documented in ocular fluid, rectal fluids, vaginal fluids, and semen [4,7]. Two recent reports indicate that this is also the case for survivors of the current (2013-2015) epidemic in West Africa, having documented

ongoing viremia in ocular [8] and seminal [1] fluids many months after falling ill. Importantly, molecular evidence from a woman who contracted EVD in Liberia after unprotected vaginal intercourse with a survivor nearly 6 months after his recovery from EVD supports the hypothesis that direct sexual transmission from asymptomatic convalescent survivors can and does occur [2]. Transmission to sexual partners was never confirmed in earlier outbreaks, but was suspected to have occurred in at least one instance [4]. Similarly, cases of sexual transmission of other hemorrhagic fever infections, notably by the closely related Marburg virus, have been suspected in the past [9,10].

Of particular epidemiological interest is the question of how long active Ebola virus in semen, vaginal, and rectal fluids of convalescent survivors poses a threat for sexual transmission. The previous studies identified active virus as late as 82 days after onset of symptoms in seminal fluid from one male patient; samples positive for viral RNA were identified as late as 29 days (rectal) and 33 days (vaginal) after onset of symptoms in one female patient of six sampled, and 101 days after onset of symptoms in seminal fluid from four out of five male patients [4,7]. The studies from the West African outbreak, showing viremia in semen 4-6 months after onset of symptoms in 65% of men tested (7-9 months in 26%) [1] and confirming occurrence of transmission from a survivor 179 days after onset of symptoms [2], suggest that sexual transmission from convalescent men may pose a threat for far longer than previously anticipated.

Sexual transmission of Ebola virus from convalescent survivors is likely a rare event, but researchers have warned that it is feasible and should be considered in epidemiological

models that are used to predict the trajectory of the outbreak [11]. To this end, we devised a novel mathematical model of EVD transmission and studied the epidemic dynamics in absence and presence of sexual transmission from convalescent men. We performed sensitivity analysis to understand the impact of key unknown parameters, such as the duration of the convalescent period and the transmission probability per sexual contact. We also performed Monte Carlo simulations to explore the impact of sexual transmission on the epidemic tail in Sierra Leone.

## Methods

**Transmission model.** We extended a SEIR (susceptible-exposed-infected-recovered) modeling framework, which has been extensively used to describe EVD transmission [12–14], by adding a component for sexual transmission from convalescent survivors who maintain active Ebola virus replication (Fig. 1). The resulting SEICR model has five states: susceptible,  $S$ , exposed,  $E$ , symptomatic and infectious,  $I$ , convalescent,  $C$ , fully recovered and immune,  $R$ , and dead,  $D$ . The model is represented by the following set of ordinary differential equations (ODEs):

$$\begin{aligned}\frac{dS}{dt} &= -\beta(t)SI - \beta_s pC \frac{S}{N} \\ \frac{dE}{dt} &= \beta(t)SI + \beta_s pC \frac{S}{N} - \sigma E \\ \frac{dI}{dt} &= \sigma E - \gamma I \\ \frac{dC}{dt} &= (1-f)\gamma I - \alpha C \\ \frac{dR}{dt} &= \alpha C \\ \frac{dD}{dt} &= f\gamma I\end{aligned}\tag{1}$$

where  $N = S + E + I + C + R$  denotes the total population size. We assumed the non-sexual transmission rate,  $\beta(t)$ , to be initially constant ( $\beta_0$ ) before it starts to decay exponentially due to the effect of control interventions and behavior change after time  $\tau$  :  
 $\beta(t) = \beta_1 + (\beta_0 - \beta_1)e^{-k(t-\tau)}$  [12]. The sexual transmission parameter,  $\beta_s$ , can be described as the product of two parameters ( $\beta_s = \eta q$ ) that we will consider separately:  $\eta$  is the per sex act transmission probability of Ebola virus from convalescent men, and  $q$  is the daily rate at which they engage in sexual intercourse. The number of convalescent individuals are scaled by  $p$ , which is the proportion of convalescent survivors who are sexually active men.  $1/\sigma$  and  $1/\gamma$  represent the average durations of incubation and symptomatic infection, respectively.  $f$  is the case fatality rate. The average duration after which convalescent patients recover completely and shed no further replicating Ebola virus from their body is given by  $1/\alpha$ . We assumed that sexual transmission is frequency-dependent [15–17], i.e., the probability that the sexual partner of a convalescent man is susceptible is given by  $S/N$ .

**Model parameters.** The basic reproductive number,  $R_0$ , for the SEICR model can be calculated using the next-generation matrix method [18,19] and is given by

$$R_0 = \frac{\beta S_0}{\gamma} + \frac{(1-f) p \beta_s}{\alpha},$$

where  $S_0$  is the initial number of susceptible individuals (see *Supplementary Material*). When  $\alpha$  goes to infinity or either  $\beta_s = 0$  or  $p = 0$ , the equation reduces to the basic reproductive number in absence of sexual transmission:  $R_{0,N} = \frac{\beta S_0}{\gamma}$ . Thus, the second

term represents the contribution of sexual transmission from convalescent patients to the

$$\text{overall } R_0: R_{0,C} = \frac{(1-f) p \beta_s}{\alpha}.$$

The model parameters were either based on published values from the literature or adjusted to provide a good description of the EVD epidemic in Sierra Leone (Table 1).

We assumed that published estimates of  $R_0$  do not include the contribution of sexual transmission, i.e., the transmission rate during the early phase of the outbreak was given by  $\beta_0 = R_{0,N} \gamma / S_0$ . We further assumed that the non-sexual reproductive number drops below unity in the presence of partially effective control interventions [20] and set  $\beta_1 = 0.5 \gamma / S_0$ . We used the weekly incidence and cumulative case counts of EVD from Sierra Leone reported by the World Health Organization (WHO) Ebola Outbreak Situation Reports (including updates according to the patient database) [21] as a comparison to the model results.

***Deterministic model and sensitivity analysis.*** We solved the system of ODEs numerically using the function *ode* from the *deSolve* package in the R software environment for statistical computing [22]. We compared the following response variables of the model: the epidemic peak number of exposed,  $E$ , acute,  $I$ , and convalescents,  $C$ , cases; the cumulative number of EVD cases, deaths, and recoveries; the date at the epidemic peak; the daily and cumulative incidence of sexual transmission; and the date at which the last symptomatic case either died or entered into convalescence (“day of last case”). We defined the day of last case as the time when the number of symptomatic and infectious individuals,  $I$ , dropped below 0.5. We considered the

following parameters for the sensitivity analysis: the per sex act transmission probability of Ebola virus from convalescent men ( $\eta$ ), the proportion of convalescent survivors who are sexually active men ( $p$ ), the rate at which they engage in sexual intercourse ( $q$ ), and the rate at which convalescent patients recover completely and shed no further replicating Ebola virus from their body ( $\alpha$ ). The sensitivity of the response variables to changes in  $R_0$  was explored simultaneously as a comparison. We generated 1000 parameter combinations from the uniform ranges, log-transformed  $[0.5x - 2x]$  for the parameter values for  $\eta$ ,  $p$ ,  $q$ , and  $\alpha$ , given in Table 1 via Latin hypercube sampling using the Huntington and Lyrantzis correlation correction method (function *lhs* from R package *pse*) [23]. We then calculated partial rank correlation coefficients (PRCCs) using 50 bootstrap replicates [24].

**Monte Carlo simulations.** We performed stochastic simulations of the SEICR model with and without sexual transmission using Gillespie's algorithm [25]. We specifically investigated the following response variables from the simulations: the cumulative number of EVD cases, the size and date of the epidemic's peak incidence (daily number of new symptomatic infections), and the date of last case (last day that symptomatic infections,  $I$ , fell below 1). Summary statistics were based on the results of 1000 simulation runs for each transmission scenario. We calculated the average of the peak and total cumulative number of EVD cases by including all simulations runs, i.e., also the simulations that rapidly go extinct. In contrast, the average dates of the epidemic peak and last case were based on the simulated epidemic trajectories over which 100 or more cases were accumulated.



166

## 167 **Results**

168 ***Contribution of sexual transmission to overall  $R_0$ .*** Using the baseline parameter values  
169 from Table 1, the reproductive number of a convalescent infection,  $R_{0,C}$ , is 0.0024. This  
170 corresponds to only 0.12% of the overall  $R_0$  of 2.0224. Increasing the convalescent period  
171 from 3 to 6 months, the contribution of  $R_{0,C}$  (0.0051) to the overall  $R_0$  rises to 0.25%. The  
172 equation for  $R_{0,C}$  (see *Methods*) illustrates that doubling the per sex act transmission  
173 probability has the same impact as doubling the convalescent period. It is important to  
174 note that the relative contribution of sexual transmission to the overall reproductive  
175 number rises as the effective reproductive number drops during the epidemic due to the  
176 effects of control interventions (see *Supplementary Material*, Fig. S1).

177

178 ***Effect of sexual transmission parameters on epidemic dynamics.*** Simulating the  
179 deterministic transmission model using the baseline parameter values from Table 1  
180 resulted in a good description of the EVD epidemic in Sierra Leone (see *Supplementary*  
181 *Material*, Fig. S2). The two key unknown parameters of sexual transmission are the per  
182 sex act transmission probability,  $\eta$ , and the rate at which convalescent survivors fully  
183 recover,  $\alpha$ . The duration of the convalescent period has the biggest impact on the peak  
184 number of convalescent individuals, while  $\eta$  does not (compare Fig. 2a and Fig. 3a). Both  
185 parameters have extremely small effects on the peak number of infected or exposed  
186 patients (Fig. 2a and Fig. 3a). The total number of recovered individuals is reached more  
187 slowly the longer the convalescent period (Fig. 2b), which is not an effect caused by  $\eta$   
188 (Fig. 3b). While the convalescent periods ( $1/\alpha = [0 - 9 \text{ months}]$ ) and the low values of  $\eta$

( $\eta = [0.0005 - 0.002]$ ) we explored create very few extra cases (Fig. 2b and Fig. 3b), sensitivity analyses revealed that a higher per sex act transmission probability, a higher proportion of sexually active convalescent individuals,  $p$ , or a higher frequency of sex acts,  $q$ , could have larger impacts on the total number of cases than would proportional increases in the convalescent period (see *Supplementary Material*, Fig. S3a). Sensitivity analyses also revealed that these sexual transmission parameters could produce a small delay on the epidemic peak, more so than by changes in the convalescent period (see *Supplementary Material*, Fig. S3b).

The number of sexual transmission events expected from the baseline scenario ( $\eta = 0.001$  and  $1/\alpha = 3$  months) is 31.5, the majority of which will occur around the peak of the epidemic (Fig. 2c and Fig. 3c) and thus likely go undetected. Doubling either  $\eta$  or  $1/\alpha$  results in almost equal increases in the incidence and cumulative number of sexual transmission events (Fig. 2c, 2d and Fig. 3c, 3d), with either leading to roughly double the number of sexually transmitted cases over the course of the whole epidemic ( $> 60$  cases). It should be noted that the total number of cases increases more than by simply the number of sexual transmission events, because each sexual transmission event results in a new potential cluster of non-sexual transmission. The day of last case is affected more by the convalescent period than the per sex act transmission probability (represented by vertical lines in Fig. 2a and Fig. 3a), a result confirmed by the sensitivity analysis (see *Supplementary Material*, Fig. S3a). The tail of the epidemic will depend on a small number of events that are likely to be affected by stochastic processes, thus we used Monte Carlo simulations to explore this behaviour.

212

213

214 *Impact of sexual transmission on the epidemic tail.* We performed stochastic  
 215 simulations of the EVD transmission model to investigate the epidemic dynamics when  
 216 the number of new cases becomes small, i.e, during the tail of the epidemic. Comparing  
 217 model simulations while assuming a convalescent period of 3 months to those without  
 218 sexual transmission confirmed the deterministic results that sexual transmission from  
 219 convalescent survivors does not lead to a significant increase in the cumulative number of  
 220 infected cases (non-STI: 11,086 +/- 599 cases; STI: 11,517 +/- 622 cases; Wilcox rank  
 221 sum test:  $W = 493156.5$ ,  $p = 0.59$ ; *Supplementary Material*, Fig. S3), nor the size (non-  
 222 STI: 86 +/- 4.4 new cases per day; STI: 89 +/- 4.6 new cases per day;  $W = 494255$ ,  $p =$   
 223  $0.65$ ) or timing (non-STI: day 200 +/- 0.7; STI: day 199 +/- 0.6;  $t = 1.1681$ ,  $df = 991.14$ ,  
 224  $p = 0.24$ ) of the epidemic peak incidence (Fig. 4a, 4b, 4c). Strikingly, this conservative  
 225 period of potential sexual transmission, which has recently been shown to extend well  
 226 beyond 3 months in at least 65% of patients [1], extended the average date on which the  
 227 last active case could be detected by nearly four months (non-STI: 497 +/- 2.9 days; STI:  
 228 619 +/- 6.0 days; difference: 123 days [95% CI: 110-137 days],  $t = -18.5$ ,  $df = 730.36$ ,  $p$   
 229  $< 0.0001$ ; Fig. 4d, 4e, 4g, 4h). The width of the tail (s.d. = 135 days) was such that 18.5%  
 230 of the 508 simulated epidemics that accumulated at least 100 cases still experienced  
 231 symptomatic individuals 730 days (two years) after the start of the epidemic (Fig. 4h).  
 232 When the convalescent period was extended from 3 months to 6 months, the projected  
 233 length of the epidemic increased to a mean of 1102 days (+/- 14.9), with 89.0% of the  
 234 489 sustained epidemics taking over two years to end (Fig. 4i). Importantly, there is

greater variance in the tail of the epidemic when sexual transmission is considered, and this uncertainty grows with the length of the convalescent period (Fig. 4g, 4h, 4i).

## Discussion

Our study shows that sexual transmission of Ebola virus from convalescent men could have a profound effect on the duration of the epidemic in Sierra Leone. Using a mathematical transmission model, we found that an average duration of the convalescent period of 3 months, and a per sex act transmission probability of 0.1% could extend the EVD epidemic in Sierra Leone by 123 days (95% CI: 110–137 days). Such a scenario would be consistent with the occurrence of a small number of sexual transmission events during the end-phase of the epidemic. So far, the reported cases of sexual transmission of EVD remain rare [1,2]. Hence, the per sex act transmission probability of Ebola virus from male convalescent survivors is unlikely to be higher than 0.1%, but might well be below this value. Our sensitivity analysis indicates that the duration of the EVD epidemic is heavily influenced by the period during which convalescent men can transmit sexually, calling for a better understanding of the persistence and duration of infectivity of Ebola virus RNA in convalescent patients.

To our knowledge, this is the first study using mathematical modeling to assess the potential impact of sexual transmission of Ebola virus on the epidemic in West Africa. We extended an accepted modeling framework that has been widely used to describe the epidemic trajectories of EVD outbreaks and epidemics [12–14]. Our baseline model provides a good description of the EVD epidemic in Sierra Leone and we performed

sensitivity analysis to account for the considerable uncertainty in key unknown parameters regarding sexual transmission. Given that chance will play a crucial role in sexual transmission of Ebola virus, we used stochastic simulations to explore the expected variability in the tail of the epidemic. In the absence of a better understanding of sexual transmission of EVD, mathematical modeling currently remains the only tool to explore its potential impact on the epidemic trajectory.

Our study provides a preliminary picture of the potential epidemiological consequences of sexual transmission of Ebola virus on the epidemic in West Africa. Consequently, there are a number of limitations that should be considered when interpreting the results. First, we limited our analysis to sexual transmission from convalescent men who remain infectious through the presence of Ebola virus in their semen. However, our modeling framework could be easily extended to account for transmission by other routes, e.g., through infectious vaginal secretions from female survivors. Second, we assumed a homogeneously mixing population to describe both non-sexual and sexual transmission of EVD. Spatial structure might play an important role in the spread of EVD [26] as close contact with infected bodily fluids is typically required even for non-sexual transmission. In particular, close contact limited to family or community members during the convalescence period, often accompanied by decreased activity levels due to post-Ebola sequelae, may help limit the chances of sexual transmission. Third, asymptomatic infection may occur [27], and is predicted to lower epidemic projections due to increased levels of immunity in the population [28]. Fourth, the model does not incorporate potential heterogeneity in sexual behavior [15], and we assumed that all sexually active

male survivors have the same average numbers of sex acts per month. The assumed frequency of sex acts (8.3 sex acts per month) came from a study of heterosexual couples in sub-Saharan Africa [29], and is on the high end of estimates gathered from studies of other populations (e.g., [29–31], but see the wide range in individual frequencies in [32]); the sexual activity of convalescent Sierra-Leonean EVD survivors has not been reported. Fifth, EVD is known to exhibit superspreading characteristics [33,34], and we did not include this in our model. Superspreading events could lead to explosive regrowth of the epidemic after the occurrence of a new case through sexual transmission [33]. On the other hand, 72% of infected individuals in transmission chains in Guinea did not generate further cases [33], suggesting that some cases of sexual transmission of EVD might not be detected at all. Sixth, we assumed a single compartment for convalescent survivors with an exponentially distributed period of convalescence. Recent data indicates that the time during which convalescent men remain positive for Ebola virus RNA could be better described by a unimodal distribution [1]. Seventh, it remains to be determined whether the virus found in semen of male convalescent survivors is replication competent, and the time window during which these men remain infectious could be shorter than the duration they remain positive for Ebola virus RNA. Finally, like other negative-sense single-stranded RNA ((-)ssRNA) viruses [35], the species currently circulating in West Africa has been estimated to have high substitution rates [36–38]. This rapid evolution detected throughout the current outbreak zone suggests that within- or between-host adaptation of the virus leading to pro-longed persistence in the seminal fluids is possible.

Awareness of the potential for sexual transmission has led to WHO issuing recommendations that ask convalescent men to abstain from sexual activity as much as possible and to use condoms for up to 6 months after the onset of symptoms [39]. Condom use and social awareness of the risks of sexual transmission during convalescence should have an impact on the per sex act transmission probability ( $\eta$ ) and the frequency of sex acts ( $q$ ), respectively. Our results show that condom use should reduce the number of sporadic sexual transmission events during the tail of the epidemic and after discharge of all remaining symptomatic individuals. However, the time during which the public health community must stay vigilant is not reduced because these interventions will not affect the time during which convalescent survivors can shed infectious virus ( $1/\alpha$ ). This is especially poignant since adherence to these recommendations will never be 100%. Better knowledge about the rate at which convalescent survivors recover completely and shed no further replicating Ebola virus from their body is thus urgently needed to plan continued surveillance efforts.

The EVD epidemic in Sierra Leone was declared to be over on 7 November 2015 [40]. Our modeling results show that sporadic events of sexual transmission of Ebola virus – potentially leading to small transmission clusters – could continue to occur in the months to come. Sexual transmission of EVD is likely to be rare, but recent events such as the suspected infection of a 16-year-old girl through sexual transmission in Makeni, Sierra Leone, during September 2015 exemplify the continued risks [41]. In addition, the considerable uncertainty around the infectivity of convalescent men who test positive for Ebola virus RNA, and the duration of this period, asks us to remain vigilant. We must

monitor and quantify this phenomena in order to help us better prepare health networks, and to provide convalescent survivors with sound advice that balances protection of the community with the harm that could come from unnecessary stigmatization [42–44]. As more data about the convalescent survivors of EVD becomes available, this and future mathematical modeling studies will help to better understand the potential epidemiological consequences of sexual transmission on the EVD epidemic in West Africa.

### **Funding statement**

JLA received post-doctoral support from the University of Bern and a grant from the French National Research Agency (ANR JC "STORY"). CLA received funding through an Ambizione grant from the Swiss National Science Foundation (project 136737). The funders had no role in study design, analysis, decision to publish, or preparation of the manuscript.



## References

1. Deen GF, Knust B, Broutet N, Sesay FR, Formenty P, Ross C, et al. Ebola RNA Persistence in Semen of Ebola Virus Disease Survivors — Preliminary Report. *N Engl J Med*. 2015; doi:10.1056/NEJMoa1511410
2. Mate SE, Kugelman JR, Nyenswah TG, Ladner JT, Wiley MR, Cordier-Lassalle T, et al. Molecular Evidence of Sexual Transmission of Ebola Virus. *N Engl J Med*. 2015; doi:10.1056/NEJMoa1509773
3. Pourrut X, Kumulungui B, Wittmann T, Moussavou G, Délicat A, Yaba P, et al. The natural history of Ebola virus in Africa. *Microbes Infect*. 2005;7: 1005–14. doi:10.1016/j.micinf.2005.04.006
4. Rowe AK, Bertolli J, Khan AS, Mukunu R, Muyembe-Tamfum JJ, Bressler D, et al. Clinical , Virologic , and Immunologic Follow-Up of Convalescent Ebola Hemorrhagic Fever Patients and Their Household Contacts , Kikwit , Democratic Republic of the Congo. *J Infect Dis*. 1999;179 Suppl: 28–35.
5. Clark D V, Kibuuka H, Millard M, Wakabi S, Lukwago L, Taylor A, et al. Long-term sequelae after Ebola virus disease in Bundibugyo, Uganda: a retrospective cohort study. *Lancet Infect Dis*. Elsevier Ltd; 2015;3099: 1–8. doi:10.1016/S1473-3099(15)70152-0
6. Bausch DG, Towner JS, Dowell SF, Kaducu F, Lukwiya M, Sanchez A, et al. Assessment of the risk of Ebola virus transmission from bodily fluids and fomites. *J Infect Dis*. 2007;196 Suppl : S142–S147. doi:10.1086/520545
7. Rodriguez LL, De Roo A, Guimard Y, Trappier SG, Sanchez A, Bressler D, et al. Persistence and genetic stability of Ebola virus during the outbreak in Kikwit,

364 Democratic Republic of the Congo, 1995. J Infect Dis. 1999;179 Suppl : S170–6.  
 365 doi:10.1086/514291

366 8. Varkey JB, Shantha JG, Crozier I, Kraft CS, Lyon GM, Mehta AK, et al.  
 367 Persistence of Ebola Virus in Ocular Fluid during Convalescence. N Engl J Med.  
 368 2015;372: 2423–2427. doi:10.1056/NEJMoa1500306

369 9. Ergonul O, Battal I. Potential sexual transmission of Crimean-Congo hemorrhagic  
 370 fever infection. Jpn J Infect Dis. 2014;67: 137–8. Available:  
 371 <http://www.ncbi.nlm.nih.gov/pubmed/24647261>

372 10. Slenczka W, Klenk HD. Forty Years of Marburg Virus. J Infect Dis. 2007;196:  
 373 S131–135. doi:10.1086/520551

374 11. Rogstad KE, Tunbridge A. Ebola virus as a sexually transmitted infection. Curr  
 375 Opin Infect Dis. 2015;28: 83–85. doi:10.1097/QCO.0000000000000135

376 12. Chowell G, Hengartner NW, Castillo-Chavez C, Fenimore PW, Hyman JM. The  
 377 basic reproductive number of Ebola and the effects of public health measures: the  
 378 cases of Congo and Uganda. J Theor Biol. 2004;229: 119–126.  
 379 doi:10.1016/j.jtbi.2004.03.006

380 13. Althaus CL. Estimating the Reproduction Number of Ebola Virus ( EBOV )  
 381 During the 2014 Outbreak in West Africa. PLOS Curr Outbreaks. 2014; 1–9.  
 382 doi:10.1371/currents.outbreaks.91afb5e0f279e7f29e7056095255b288.Abstract

383 14. Althaus CL, Low N, Musa EO, Shuaib F, Gsteiger S. Ebola virus disease outbreak  
 384 in Nigeria: Transmission dynamics and rapid control. Epidemics. Elsevier B.V.;  
 385 2015;11: 80–84. doi:10.1016/j.epidem.2015.03.001

- 386 15. Anderson RM, May RM. Infectious Diseases of Humans: Dynamics and Control.  
387 Oxford: Oxford Univeristy Press; 1991.
- 388 16. Thrall PH, Antonovics J. Polymorphism in sexual versus non-sexual disease  
389 transmission. Proc R Soc B Biol Sci. 1997;264: 581–587.
- 390 17. Garnett GP. An introduction to mathematical models in sexually transmitted  
391 disease epidemiology. Sex Transm Infect. 2002;78: 7–12. doi:10.1136/sti.78.1.7
- 392 18. Diekmann O, Heesterbeek JAP. Mathematical Epidemiology of Infectious  
393 Diseases. Chichester: John Wiley and Sons; 2000.
- 394 19. Diekmann O, Heesterbeek J a, Metz J a. On the definition and the computation of  
395 the basic reproduction ratio  $R_0$  in models for infectious diseases in heterogeneous  
396 populations. J Math Biol. 1990;28: 365–382. doi:10.1007/BF00178324
- 397 20. Kucharski AJ, Eggo RM, Watson CH, Camacho A, Funk S, Edmunds WJ.  
398 Effectiveness of Ring Vaccination as Control Strategy for Ebola Virus Disease.  
399 Emerg Infect Dis. 2016;22. doi:10.3201/eid2201.151410
- 400 21. World Health Organization (WHO). Ebola data and statistics: Data on new cases  
401 per epi week for Sierra Leone [Internet]. 2015 [cited 18 Nov 2015]. Available:  
402 [http://apps.who.int/gho/data/node.ebola-sitrep.ebola-country-SLE-](http://apps.who.int/gho/data/node.ebola-sitrep.ebola-country-SLE-20151118?lang=en)  
403 [20151118?lang=en](http://apps.who.int/gho/data/node.ebola-sitrep.ebola-country-SLE-20151118?lang=en)
- 404 22. R Core Team. R: A Language and Environment for Statistical Computing  
405 [Internet]. Vienna, Austria: R Foundation for Statistical Computing; 2014.  
406 Available: <http://www.r-project.org/>
- 407 23. Chalom A, Prado PIKL. pse: Parameter space exploration with Latin Hypercubes  
408 [Internet]. 2014. Available: <http://cran.r-project.org/package=pse>

- 409 24. Blower SM, Dowlatabadi H. Sensitivity and Uncertainty Analysis of Complex  
410 Models of Disease Transmission: An HIV Model, as an Example. *Int Stat Rev.*  
411 1994;62: 229–243. doi:10.2307/1403510
- 412 25. Gillespie DT. Exact Stochastic Simulation of couple chemical reactions. *J Phys*  
413 *Chem.* 1977;81: 2340–2361. doi:10.1021/j100540a008
- 414 26. Merler S, Ajelli M, Fumanelli L, Gomes MFC, Piontti APY, Rossi L, et al.  
415 Spatiotemporal spread of the 2014 outbreak of Ebola virus disease in Liberia  
416 and the effectiveness of non-pharmaceutical interventions: a computational  
417 modelling analysis. *Lancet Infect Dis.* Elsevier Ltd; 2015;3099: 1–8.  
418 doi:10.1016/S1473-3099(14)71074-6
- 419 27. Leroy EM, Baize S, Volchkov VE, Capron M, Debré P, McCormick JB, et al.  
420 Human asymptomatic Ebola infection and strong inflammatory response. *Lancet.*  
421 2000;355: 2210 – 2215.
- 422 28. Bellan SE, Pulliam JRC, Dushoff J, Meyers LA. Ebola control: effect of  
423 asymptomatic infection and acquired immunity. *Lancet.* Elsevier Ltd; 2014;384:  
424 1499–1500. doi:10.1016/S0140-6736(14)61839-0
- 425 29. Gray RH, Wawer MJ, Brookmeyer R, Sewankambo NK, Serwadda D, Wabwire-  
426 Mangu F, et al. Probability of HIV-1 transmission per coital act in monogamous,  
427 heterosexual, HIV-1-discordant couples in Rakai, Uganda. *Lancet.* 2001;357:  
428 1149–1153. doi:10.1016/S0140-6736(00)04331-2
- 429 30. Blower SM, Boe C. Sex acts, sex partners, and sex budgets: implications for risk  
430 factor analysis and estimation of HIV transmission probabilities. *J Acquir Immune*  
431 *Defic Syndr.* 1993;6: 1347–1352.

- 432 31. Althaus CL, Choisy M, Alizon S, CSF group. Number of sex acts matters for  
433 heterosexual transmission and control of Chlamydia trachomatis. PeerJ Prepr.  
434 2015;3: e1164. doi:10.7287/peerj.preprints.940v1
- 435 32. Smith J, Nyamukapa C, Gregson S, Lewis J, Magutshwa S, Schumacher C, et al.  
436 The Distribution of Sex Acts and Condom Use within Partnerships in a Rural Sub-  
437 Saharan African Population. PLoS One. 2014;9: e88378.  
438 doi:10.1371/journal.pone.0088378
- 439 33. Althaus CL. Ebola superspreading. Lancet Infect Dis. 2015;15: 507–508.  
440 doi:10.1016/S1473-3099(15)70135-0
- 441 34. Toth DJ a, Gundlapalli A V, Khader K, Pettey WBP, Rubin M a, Adler FR, et al.  
442 Estimates of Outbreak Risk from New Introductions of Ebola with Immediate and  
443 Delayed Transmission Control. Emerg Infect Dis J. 2015;21: 1402.  
444 doi:10.3201/eid2108.150170
- 445 35. Duffy S, Shackelton L a., Holmes EC. Rates of evolutionary change in viruses:  
446 patterns and determinants. Nat Rev Genet. 2008;9: 267–276. doi:10.1038/nrg2323
- 447 36. Gire SK, Goba A, Andersen KG, Sealfon RSG, J PD, Kanneh L, et al. Genomic  
448 surveillance elucidates Ebola virus origin and transmission during the 2014  
449 outbreak. Science (80- ). 2014; doi:10.1126/science.1259657
- 450 37. Park DJ, Dudas G, Wohl S, Goba A, Whitmer SLM, Andersen KG, et al. Ebola  
451 Virus Epidemiology, Transmission, and Evolution during Seven Months in Sierra  
452 Leone. Cell. 2015;161: 1516–1526. doi:10.1016/j.cell.2015.06.007

- 453 38. Tong Y-G, Shi W-F, Liu D, Qian J, Liang L, Bo X-C, et al. Genetic diversity and  
454 evolutionary dynamics of Ebola virus in Sierra Leone. *Nature*. 2015;524: 93–96.  
455 doi:10.1038/nature14490
- 456 39. World Health Organization (WHO). WHO website [Internet]. Available:  
457 <http://www.who.int/reproductivehealth/topics/rtis/ebola-virus-semen/en/>
- 458 40. World Health Organization (WHO). WHO Ebola Situation Report (11 November  
459 2015). [Internet]. 2015. Available: [http://apps.who.int/ebola/current-](http://apps.who.int/ebola/current-situation/ebola-situation-report-11-november-2015)  
460 [situation/ebola-situation-report-11-november-2015](http://apps.who.int/ebola/current-situation/ebola-situation-report-11-november-2015)
- 461 41. Reuters News Agency. Hundreds quarantined as Ebola returns to north Sierra  
462 Leone district. Sept 14. 2015. Available:  
463 [http://www.reuters.com/article/2015/09/14/us-health-ebola-leone-](http://www.reuters.com/article/2015/09/14/us-health-ebola-leone-idUSKCN0RE1P620150914)  
464 [idUSKCN0RE1P620150914](http://www.reuters.com/article/2015/09/14/us-health-ebola-leone-idUSKCN0RE1P620150914)
- 465 42. Davtyan M, Brown B, Folayan MO. Addressing Ebola-related Stigma: Lessons  
466 Learned from HIV/AIDS. *Glob Health Action*. 2014;7: 1–4.  
467 doi:10.3402/gha.v7.26058
- 468 43. Obilade TT. Ebola Virus Disease Stigmatization; The Role of Societal Attributes.  
469 *Int Arch Med*. 2015;8: 1–19. doi:10.3823/1613
- 470 44. Sprecher A. Handle Survivors with Care. *N Engl J Med*. 2015;  
471 doi:10.1056/NEJMe1512928
- 472 45. WHO Ebola Response Team. Ebola Virus Disease in West Africa — The First 9  
473 Months of the Epidemic and Forward Projections. *Engl New J Med*. 2014;371:  
474 1481–1495. doi:10.1056/NEJMoa1411100

- 475 46. Alizon S, Lion S, Murall CL, Abbate JL. Quantifying the epidemic spread of Ebola  
476 virus (EBOV) in Sierra Leone using phylodynamics. *Virulence*. 2015;5: 825–827.  
477 doi:10.4161/21505594.2014.976514
- 478 47. World Health Organization (WHO). Data from: Ebola data and statistics [Internet].  
479 2015. Available: [http://apps.who.int/gho/data/view ebola-sitrep ebola-country-](http://apps.who.int/gho/data/view ebola-sitrep ebola-country-SLE-20150923-data?lang=en)  
480 [SLE-20150923-data?lang=en](http://apps.who.int/gho/data/view ebola-sitrep ebola-country-SLE-20150923-data?lang=en)
- 481 48. The World Bank. Sierra Leone country at a glance [Internet]. 2015. Available:  
482 <http://www.worldbank.org/en/country/sierraleone>
- 483 49. Wawer MJ, Gray RH, Sewankambo NK, Serwadda D, Li X, Laeyendecker O, et  
484 al. Rates of HIV-1 transmission per coital act, by stage of HIV-1 infection, in  
485 Rakai, Uganda. *J Infect Dis*. 2005;191: 1403–1409. doi:10.1086/429411  
486

**Table 1: Model parameters describing EVD transmission in Sierra Leone.** The indicated parameter ranges are used for the sensitivity analysis (partial rank correlation coefficients, PRCC) only.

| Parameter                                                                   |            | Value (Range)                             | Comments and References                                                                                                                                                                   |
|-----------------------------------------------------------------------------|------------|-------------------------------------------|-------------------------------------------------------------------------------------------------------------------------------------------------------------------------------------------|
| Basic reproductive number                                                   | $R_{0,N}$  | 2.02<br>(1.26 – 2.53)                     | Non-sexual transmission only [45]<br>Range explores estimates from [13] and [46]                                                                                                          |
| Date of onset of symptoms in index case                                     |            | April 6, 2014                             | WHO epidemic day 92, epidemic week 14 [47]                                                                                                                                                |
| Rate at which transmission rate decays                                      | $k$        | 0.01 d <sup>-1</sup>                      | Results in a good description of the EVD epidemic in Sierra Leone                                                                                                                         |
| Time at which transmission rate starts to decay                             | $\tau$     | 90 d                                      | We assume that control measures were not effectively deployed country-wide until three months following the first detected case ( $R_{0,N}$ estimates began to fall in August 2014 [45]). |
| Initial population size                                                     | $N_0$      | 6.316x10 <sup>6</sup>                     | Based on 2014 estimate [48]                                                                                                                                                               |
| Incubation period                                                           | $1/\sigma$ | 9.31 d                                    | [14]                                                                                                                                                                                      |
| Case fatality rate                                                          | $f$        | 0.69                                      | [45]                                                                                                                                                                                      |
| Infectious period                                                           | $1/\gamma$ | 7.41 d                                    | [14]                                                                                                                                                                                      |
| Sexual transmission probability (per coital act)                            | $\eta$     | 0.001<br>(0.0005 – 0.002)                 | Roughly based on sexual transmission probability of HIV per coital act from infected men [49]                                                                                             |
| Frequency of sex acts                                                       | $q$        | 0.272 d <sup>-1</sup><br>(0.136 – 0.544)  | 8.27 coital acts per month [29]                                                                                                                                                           |
| Proportion of convalescent survivors who are infectious and sexually active | $p$        | 0.347<br>(0.1725-0.694)                   | Of 47.4% male survivors, 73.1% are aged 15-45 [45].                                                                                                                                       |
| Rate at which convalescent survivors recover completely                     | $\alpha$   | 1/83.84 d <sup>-1</sup><br>(1/168 – 1/42) | 3 months after onset of symptoms [4,39] and assuming an infectious period of 7.41 days                                                                                                    |

490



491 **Figure 1. Schematic illustration of EVD transmission model including sexual**  
 492 **transmission from convalescent patients.** The elements in black form the base model  
 493 without sexual transmission [12–14]. The red elements (convalescent individuals and  
 494 additional transmission term) were added to account for sexual transmission.

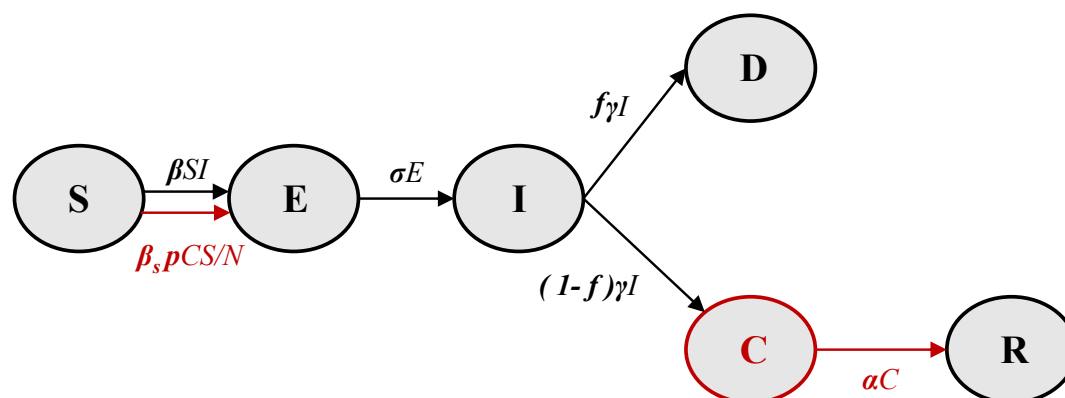

495

496 **Figure 2. Effect of convalescent period on EVD epidemics.** The average duration of  
 497 the convalescent period ( $1/\alpha$ ) is varied between 3 and 9 months. (a, b): Epidemic  
 498 trajectories in presence (broken lines) and absence of sexual transmission (solid lines).  
 499 Vertical lines mark the day of last symptomatic case. (c) Daily incidence of sexual  
 500 transmission. (d) Cumulative number of sexual transmission events. Note that the vertical  
 501 axes vary across panels.

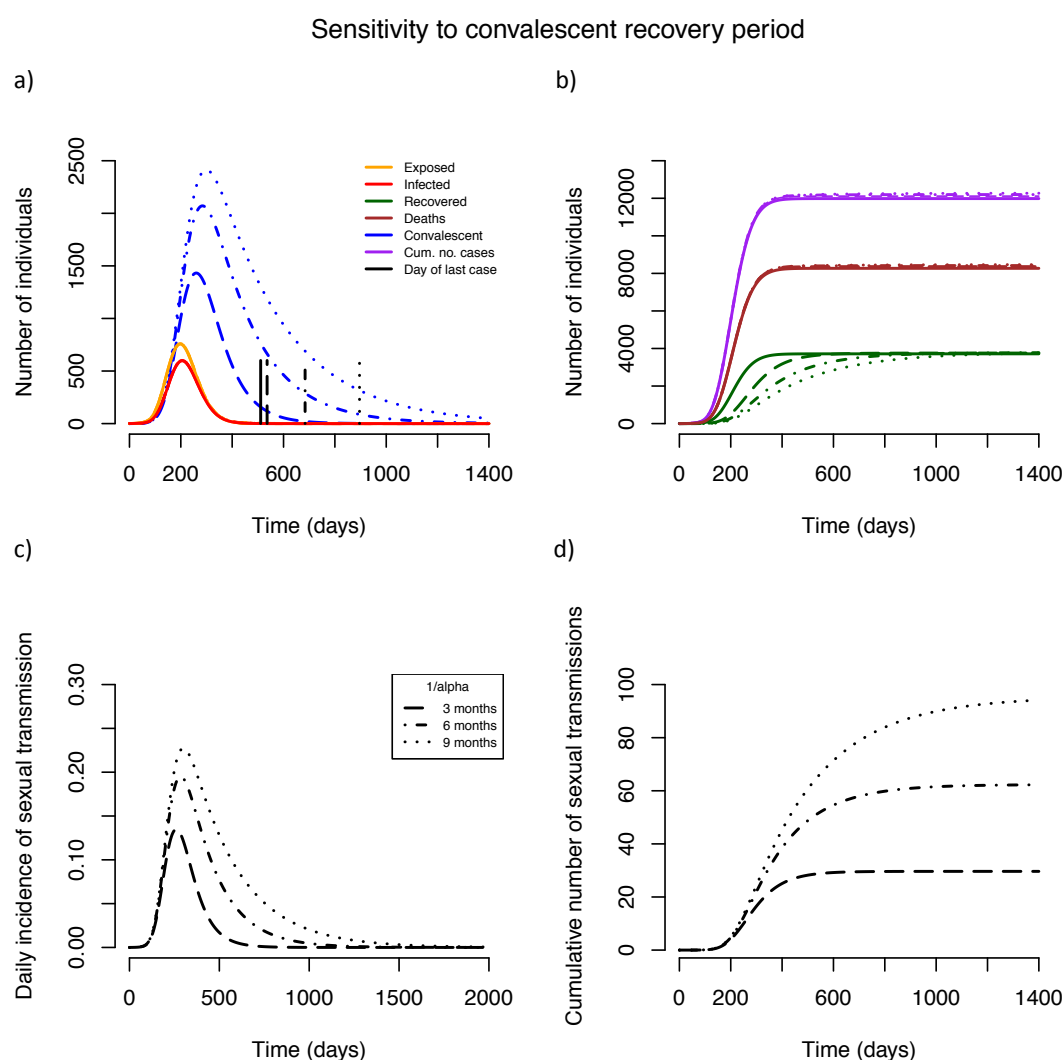

504 **Figure 3. Effect of per sex act transmission probability on EVD epidemics.** The per  
505 sex act transmission probability ( $\eta$ ) is varied between 0.05% and 0.2%. (a, b): Epidemic  
506 trajectories in presence (broken lines) and absence of sexual transmission (solid lines).  
507 Vertical lines mark the day of last symptomatic case. (c) Daily incidence of sexual  
508 transmission. (d) Cumulative number of sexual transmission events. Note that the vertical  
509 axes vary across panels.

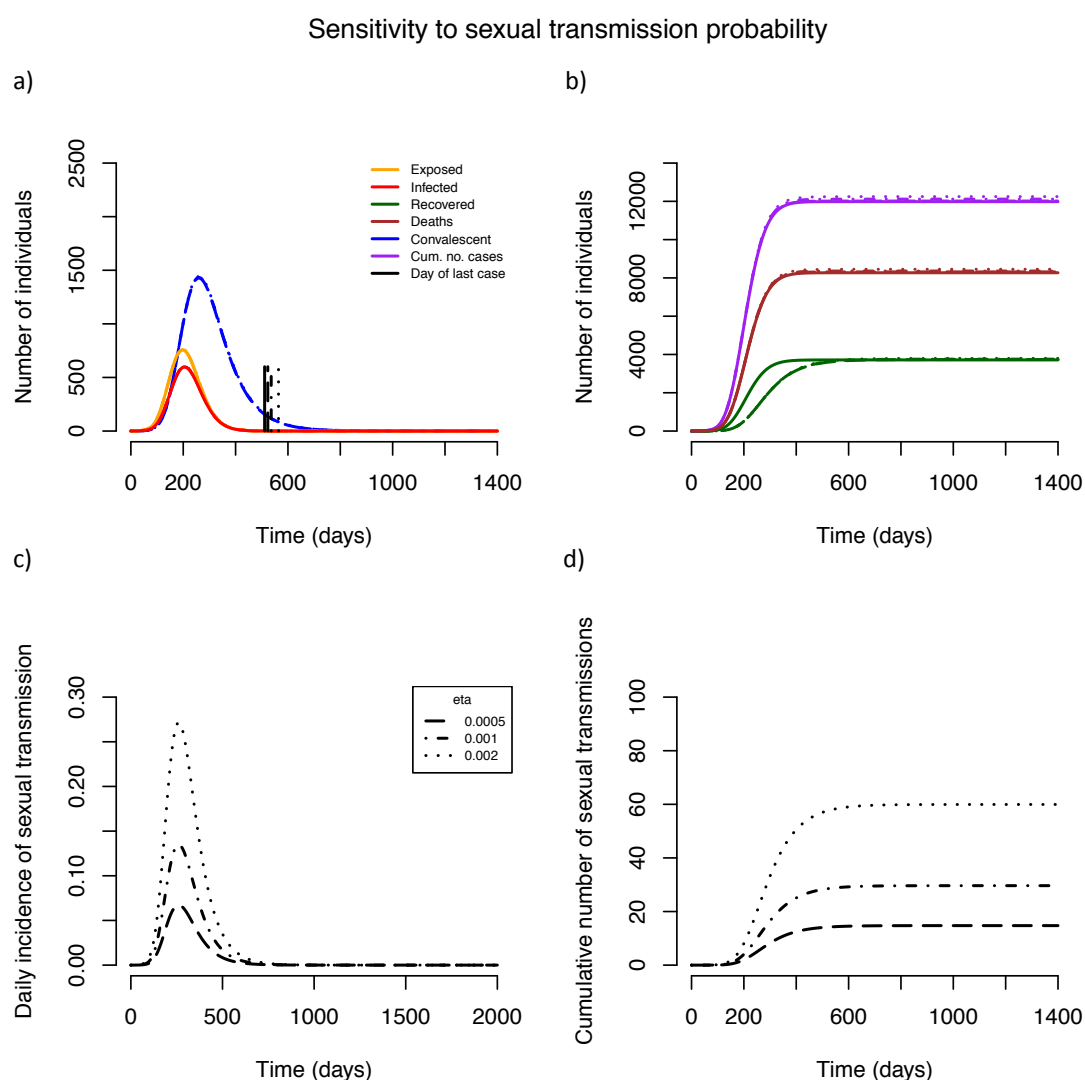

512 **Figure 4. Impact of convalescent period on the tail of the EVD epidemic.** Monte  
513 Carlo simulations of the weekly incidence of new cases (a, b, c) and the sporadic  
514 occurrence of sexual transmission events at the epidemic tail (d, e, f), assuming no sexual  
515 transmission (a, d), and sexual transmission with a 3 (b, e) and 6 months (c, f)  
516 convalescent period. Thin red lines show the result of 200 simulated trajectories, with  
517 corresponding mean (thick blue line) and standard errors (thin blue lines). Black dots  
518 denote incident cases in Sierra Leone as reported by the WHO [21]. The thick red lines in  
519 (d), (e), and (f) highlight a single representative trajectory, and the dark red dots along the  
520 horizontal axis indicate a sexual transmission event. Histograms of the day of the last  
521 EVD case from 1,000 simulated epidemics in absence of sexual transmission (g) and for a  
522 convalescent period of 3 (h) and 6 (i) months.

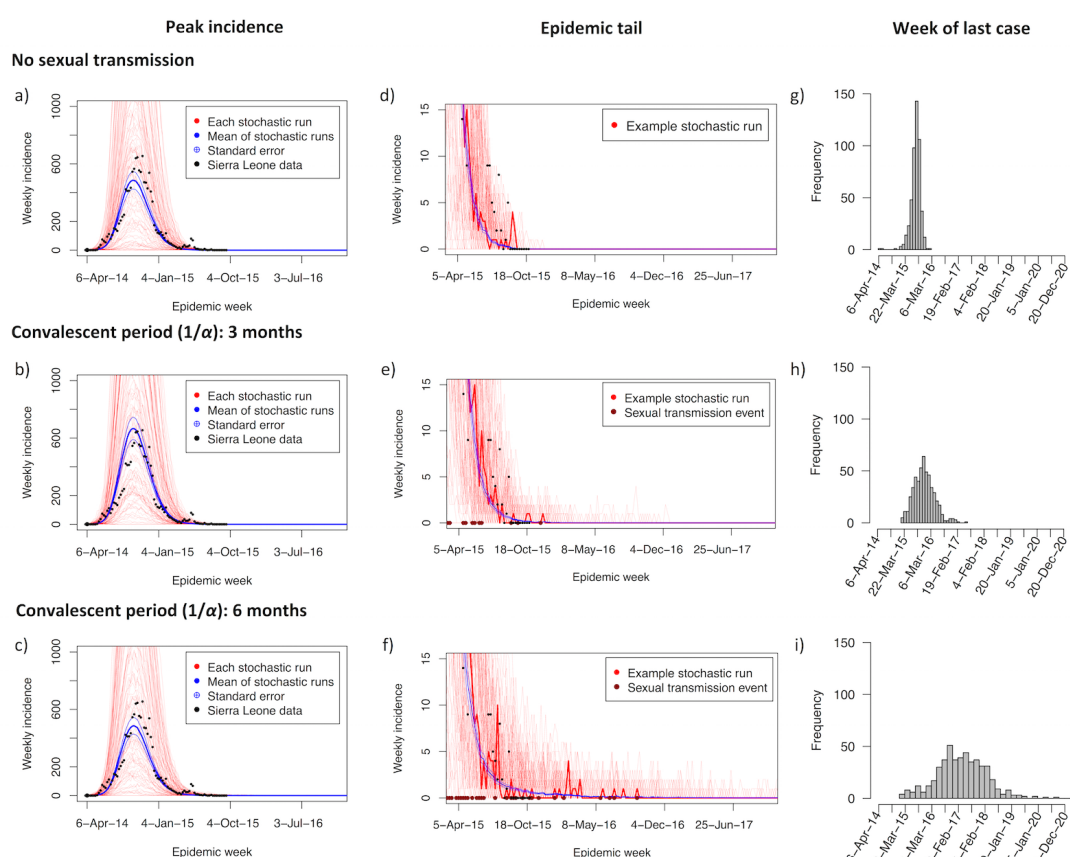

Source: http://biorxiv.org/content/10.1101/031880v2.full.pdf
